# Supplementary material for: Fuzzy Multidimensional Assessment Approach of Travel Deprivation in Small Underdeveloped Cities: Case Study of Lhasa, China
Source: Hindawi journal article supplement (doi:10.1155/2021/8851449), 2021-04-15
Supplement: f1 [file 8851449.f1.doc]

**Appendix A**

**See Table A1.**

TABLE A1: Travel deprivation scores for monetary indicators and non-monetary indicators of 30 samples in the Zhucheng area

| **Code** | **S11** | **S12** | **S13** | **S14** | **S15** | **S16** | **S1** | **Disinc** |
| --- | --- | --- | --- | --- | --- | --- | --- | --- |
| 1 | 0 | 0 | 0 | 0 | 0 | 0 | 1.00 | 3580 |
| 2 | 0 | 0 | 0 | 0 | 0 | 0 | 1.00 | 1520 |
| 3 | 1 | 0 | 0 | 1 | 0 | 0 | 0.74 | 1280 |
| 4 | 0 | 0 | 1 | 0 | 0 | 0 | 0.63 | 3990 |
| 5 | 0 | 0 | 0 | 0 | 0 | 0 | 1.00 | 1630 |
| 6 | 0 | 0 | 0 | 0 | 0 | 0 | 1.00 | 1750 |
| 7 | 0 | 0 | 0 | 0 | 0 | 0 | 1.00 | 4580 |
| 8 | 0 | 0 | 1 | 1 | 0 | 1 | 0.52 | 1890 |
| 9 | 1 | 0 | 0 | 0 | 0 | 0 | 0.84 | 1220 |
| 10 | 0 | 0 | 0 | 0 | 0 | 0 | 1.00 | 2780 |
| 11 | 0 | 0 | 0 | 1 | 0 | 0 | 0.90 | 2050 |
| 12 | 0 | 0 | 0 | 0 | 0 | 0 | 1.00 | 2140 |
| 13 | 1 | 1 | 0 | 0 | 1 | 1 | 0.74 | 1160 |
| 14 | 0 | 0 | 0 | 0 | 0 | 0 | 1.00 | 2280 |
| 15 | 1 | 1 | 1 | 0 | 1 | 1 | 0.10 | 1100 |
| 16 | 0 | 0 | 0 | 0 | 0 | 0 | 1.00 | 2990 |
| 17 | 0 | 0 | 0 | 0 | 0 | 0 | 1.00 | 3200 |
| 18 | 0 | 0 | 0 | 0 | 0 | 0 | 0.94 | 1040 |
| 19 | 0 | 0 | 0 | 0 | 1 | 0 | 1.00 | 2390 |
| 20 | 1 | 0 | 0 | 0 | 0 | 0 | 0.84 | 980 |
| 21 | 0 | 0 | 0 | 1 | 0 | 0 | 0.90 | 2500 |
| 22 | 0 | 0 | 0 | 0 | 0 | 0 | 1.00 | 920 |
| 23 | 0 | 0 | 0 | 1 | 0 | 0 | 0.90 | 3390 |
| 24 | 1 | 0 | 1 | 1 | 1 | 0 | 0.30 | 860 |
| 25 | 0 | 0 | 0 | 0 | 0 | 0 | 1.00 | 1500 |
| 26 | 1 | 0 | 0 | 0 | 0 | 0 | 0.84 | 1450 |
| 27 | 0 | 0 | 0 | 0 | 0 | 0 | 1.00 | 3480 |
| 28 | 0 | 0 | 0 | 0 | 0 | 0 | 1.00 | 1400 |
| 29 | 1 | 1 | 0 | 1 | 0 | 1 | 0.44 | 800 |
| 30 | 0 | 0 | 0 | 0 | 0 | 0 | 1.00 | 1340 |

Remark: labels of Variables S11- S16 and Disinc defined as Table 2, and the label of Variable **S1** defined as Table 1.

TABLE A1: Continued

| **Code** | **S21** | **S22** | **S23** | **S2** | **S31** | **S32** | **S33** | **S34** | **S35** | **S3** | **S41** | **S42** | **S43** | **S44** | **S4** | **S51** | **S52** | **S53** | **S54** | **S55** | **S5** | **S61** | **S62** | **S63** | **S64** | **S6** |
| --- | --- | --- | --- | --- | --- | --- | --- | --- | --- | --- | --- | --- | --- | --- | --- | --- | --- | --- | --- | --- | --- | --- | --- | --- | --- | --- |
| 1 | 0 | 0 | 0 | 1.00 | 0 | 0 | 0 | 0 | 0 | 0.90 | 0 | 0 | 1 | 0 | 0.57 | 0 | 0 | 1 | 0 | 1 | 0.54 | 0 | 0 | 0 | 0 | 1.00 |
| 2 | 0 | 0 | 1 | 0.70 | 1 | 0 | 0 | 1 | 0 | 0.48 | 0 | 0 | 1 | 0 | 0.57 | 1 | 0 | 0 | 0 | 1 | 0.44 | 1 | 0 | 0 | 0 | 0.52 |
| 3 | 1 | 0 | 1 | 0.16 | 1 | 1 | 0 | 1 | 1 | 0.16 | 1 | 1 | 1 | 0 | 0.16 | 1 | 1 | 1 | 0 | 1 | 0.10 | 1 | 1 | 1 | 0 | 0.16 |
| 4 | 0 | 0 | 1 | 0.70 | 0 | 0 | 0 | 1 | 1 | 0.84 | 0 | 1 | 0 | 0 | 0.88 | 0 | 0 | 1 | 0 | 0 | 0.94 | 0 | 0 | 0 | 0 | 1.00 |
| 5 | 0 | 1 | 0 | 0.84 | 1 | 0 | 0 | 1 | 0 | 0.48 | 1 | 0 | 0 | 1 | 0.56 | 1 | 0 | 1 | 0 | 0 | 0.78 | 1 | 0 | 0 | 0 | 0.52 |
| 6 | 1 | 1 | 0 | 0.30 | 1 | 0 | 0 | 0 | 0 | 0.58 | 0 | 1 | 1 | 0 | 0.44 | 1 | 1 | 0 | 1 | 0 | 0.46 | 1 | 0 | 1 | 0 | 0.43 |
| 7 | 0 | 1 | 0 | 0.84 | 0 | 0 | 0 | 0 | 0 | 1.00 | 0 | 0 | 0 | 0 | 1.00 | 0 | 0 | 1 | 0 | 0 | 0.94 | 1 | 0 | 0 | 0 | 0.52 |
| 8 | 0 | 0 | 1 | 0.70 | 1 | 0 | 0 | 0 | 1 | 0.52 | 0 | 1 | 0 | 0 | 0.88 | 0 | 1 | 1 | 0 | 0 | 0.67 | 0 | 1 | 0 | 0 | 0.73 |
| 9 | 1 | 1 | 0 | 0.30 | 1 | 1 | 0 | 1 | 0 | 0.22 | 1 | 1 | 0 | 0 | 0.60 | 1 | 1 | 1 | 0 | 1 | 0.10 | 1 | 0 | 0 | 0 | 0.52 |
| 10 | 1 | 0 | 1 | 0.10 | 0 | 0 | 0 | 1 | 0 | 0.90 | 0 | 0 | 1 | 0 | 0.57 | 0 | 0 | 0 | 0 | 0 | 1.00 | 0 | 0 | 0 | 0 | 1.00 |
| 11 | 0 | 1 | 0 | 0.84 | 1 | 0 | 0 | 1 | 0 | 0.48 | 1 | 0 | 0 | 1 | 0.56 | 0 | 1 | 0 | 1 | 0 | 0.62 | 1 | 0 | 0 | 0 | 0.52 |
| 12 | 1 | 0 | 1 | 0.16 | 0 | 0 | 0 | 1 | 0 | 0.90 | 0 | 1 | 0 | 1 | 0.71 | 1 | 1 | 1 | 0 | 1 | 0.10 | 0 | 0 | 0 | 1 | 0.84 |
| 13 | 0 | 0 | 0 | 1.00 | 1 | 1 | 0 | 0 | 0 | 0.32 | 0 | 0 | 0 | 1 | 0.84 | 0 | 0 | 0 | 0 | 0 | 1.00 | 0 | 0 | 0 | 1 | 0.84 |
| 14 | 0 | 1 | 0 | 0.84 | 0 | 0 | 0 | 0 | 0 | 1.00 | 1 | 0 | 0 | 0 | 0.72 | 1 | 0 | 1 | 0 | 1 | 0.38 | 1 | 0 | 0 | 0 | 0.52 |
| 15 | 1 | 0 | 0 | 0.46 | 0 | 1 | 0 | 0 | 0 | 0.74 | 1 | 1 | 0 | 1 | 0.43 | 1 | 1 | 1 | 0 | 1 | 0.10 | 0 | 0 | 0 | 1 | 0.84 |
| 16 | 0 | 0 | 0 | 1.00 | 0 | 0 | 0 | 0 | 0 | 1.00 | 0 | 0 | 0 | 0 | 1.00 | 0 | 0 | 0 | 0 | 0 | 1.00 | 0 | 0 | 0 | 0 | 1.00 |
| 17 | 0 | 0 | 0 | 1.00 | 0 | 0 | 0 | 0 | 0 | 1.00 | 0 | 1 | 1 | 0 | 0.44 | 0 | 0 | 0 | 0 | 0 | 1.00 | 0 | 0 | 0 | 0 | 1.00 |
| 18 | 0 | 1 | 0 | 0.84 | 1 | 1 | 1 | 1 | 0 | 0.06 | 1 | 1 | 0 | 1 | 0.43 | 0 | 0 | 0 | 0 | 1 | 0.60 | 0 | 0 | 0 | 1 | 0.84 |
| 19 | 1 | 0 | 1 | 0.16 | 0 | 0 | 0 | 1 | 0 | 0.90 | 1 | 0 | 1 | 0 | 0.29 | 0 | 0 | 0 | 0 | 1 | 0.60 | 1 | 0 | 0 | 0 | 0.52 |
| 20 | 0 | 0 | 1 | 0.70 | 1 | 1 | 0 | 0 | 0 | 0.32 | 0 | 1 | 0 | 0 | 0.88 | 1 | 1 | 0 | 0 | 0 | 0.56 | 1 | 0 | 0 | 0 | 0.52 |
| 21 | 0 | 1 | 0 | 0.84 | 1 | 0 | 0 | 1 | 0 | 0.48 | 0 | 0 | 0 | 0 | 1.00 | 0 | 1 | 1 | 0 | 1 | 0.26 | 0 | 0 | 0 | 0 | 1.00 |
| 22 | 1 | 0 | 1 | 0.16 | 1 | 1 | 0 | 1 | 0 | 0.22 | 1 | 1 | 0 | 0 | 0.60 | 1 | 0 | 0 | 1 | 0 | 0.74 | 1 | 0 | 0 | 1 | 0.36 |
| 23 | 1 | 0 | 1 | 0.16 | 0 | 0 | 0 | 0 | 0 | 1.00 | 0 | 0 | 0 | 0 | 1.00 | 1 | 1 | 1 | 0 | 1 | 0.10 | 0 | 0 | 0 | 0 | 1.00 |
| 24 | 1 | 0 | 1 | 0.16 | 1 | 1 | 0 | 1 | 1 | 0.16 | 1 | 0 | 1 | 0 | 0.29 | 1 | 0 | 1 | 0 | 1 | 0.38 | 0 | 0 | 0 | 1 | 0.84 |
| 25 | 0 | 1 | 0 | 0.84 | 1 | 0 | 0 | 1 | 0 | 0.48 | 1 | 0 | 1 | 0 | 0.29 | 1 | 1 | 1 | 0 | 1 | 0.10 | 1 | 0 | 0 | 0 | 0.52 |
| 26 | 1 | 0 | 1 | 0.16 | 0 | 0 | 0 | 1 | 0 | 0.90 | 1 | 0 | 0 | 1 | 0.56 | 0 | 0 | 0 | 0 | 1 | 0.60 | 0 | 0 | 0 | 0 | 1.00 |
| 27 | 0 | 1 | 0 | 0.40 | 0 | 0 | 0 | 1 | 0 | 0.90 | 0 | 0 | 0 | 0 | 1.00 | 0 | 0 | 0 | 0 | 0 | 1.00 | 0 | 0 | 0 | 0 | 1.00 |
| 28 | 0 | 1 | 0 | 0.84 | 1 | 0 | 0 | 1 | 0 | 0.48 | 1 | 0 | 0 | 1 | 0.56 | 0 | 1 | 0 | 1 | 0 | 0.62 | 1 | 0 | 0 | 0 | 0.52 |
| 29 | 0 | 1 | 1 | 0.54 | 1 | 0 | 0 | 0 | 0 | 0.58 | 1 | 0 | 0 | 1 | 0.56 | 0 | 1 | 0 | 0 | 0 | 0.72 | 0 | 1 | 0 | 0 | 0.73 |
| 30 | 1 | 0 | 1 | 0.16 | 0 | 0 | 0 | 0 | 0 | 1.00 | 0 | 0 | 1 | 0 | 0.57 | 1 | 0 | 1 | 0 | 1 | 0.38 | 0 | 0 | 0 | 0 | 1.00 |

Remark: labels of Variables S11- S16 and Disinc defined as Table 2, and the label of Variable **S1** defined as Table 1.

**Appendix B**

**See Table B1.**

TABLE B1: Average values of travel deprivation in the case of the Zhucheng area

| **code** | **Disinc** | **1-F1** | **1-L1** | **FSM1** |
| --- | --- | --- | --- | --- |
| 29 | 800 | 1.00 | 1.00 | 1.00 |
| 24 | 860 | 0.97 | 0.99 | 0.95 |
| 22 | 920 | 0.93 | 0.97 | 0.91 |
| 20 | 980 | 0.90 | 0.95 | 0.86 |
| 18 | 1040 | 0.87 | 0.94 | 0.81 |
| 15 | 1100 | 0.83 | 0.92 | 0.77 |
| 13 | 1160 | 0.80 | 0.90 | 0.72 |
| 9 | 1220 | 0.77 | 0.88 | 0.68 |
| 3 | 1280 | 0.73 | 0.86 | 0.63 |
| 30 | 1340 | 0.70 | 0.84 | 0.59 |
| 27 | 1400 | 0.67 | 0.82 | 0.54 |
| 26 | 1450 | 0.63 | 0.79 | 0.50 |
| 25 | 1500 | 0.60 | 0.77 | 0.46 |
| 2 | 1520 | 0.57 | 0.74 | 0.42 |
| 5 | 1630 | 0.53 | 0.72 | 0.38 |
| 6 | 1750 | 0.50 | 0.69 | 0.34 |
| 8 | 1890 | 0.47 | 0.66 | 0.31 |
| 11 | 2050 | 0.43 | 0.62 | 0.27 |
| 12 | 2140 | 0.40 | 0.59 | 0.24 |
| 14 | 2280 | 0.37 | 0.55 | 0.20 |
| 19 | 2390 | 0.33 | 0.51 | 0.17 |
| 21 | 2500 | 0.30 | 0.47 | 0.14 |
| 10 | 2780 | 0.27 | 0.43 | 0.11 |
| 16 | 2990 | 0.23 | 0.38 | 0.09 |
| 17 | 3200 | 0.20 | 0.32 | 0.06 |
| 4 | 3390 | 0.17 | 0.27 | 0.04 |
| 27 | 3480 | 0.13 | 0.21 | 0.03 |
| 1 | 3580 | 0.10 | 0.15 | 0.02 |
| 23 | 3990 | 0.07 | 0.09 | 0.01 |
| 7 | 4580 | 0.00 | 0.00 | 0.00 |
| Sum | 61190 |  |  | 0.4082 |

Remark: labels of Variables in table B1 defined as Equation (7)-(11).

TABLE B1: Continued

| **Code** | **S1** | **1-F2** | **1-L2** | **FSM2** | **Code** | **S2** | **1-F3** | **1-L3** | **FSM3** | **Code** | **S3** | **1-F4** | **1-L4** | **FSM4** |
| --- | --- | --- | --- | --- | --- | --- | --- | --- | --- | --- | --- | --- | --- | --- |
| 15 | 0.10 | 1.00 | 1.00 | 1.00 | 3 | 0.16 | 1.00 | 1.00 | 1.00 | 18 | 0.06 | 1.00 | 1.00 | 1.00 |
| 24 | 0.30 | 0.97 | 0.99 | 0.96 | 10 | 0.16 | 1.00 | 1.00 | 1.00 | 3 | 0.16 | 0.93 | 0.98 | 0.91 |
| 29 | 0.44 | 0.93 | 0.97 | 0.91 | 12 | 0.16 | 1.00 | 1.00 | 1.00 | 24 | 0.16 | 0.93 | 0.98 | 0.91 |
| 8 | 0.52 | 0.90 | 0.95 | 0.86 | 19 | 0.16 | 1.00 | 1.00 | 1.00 | 9 | 0.22 | 0.87 | 0.96 | 0.84 |
| 4 | 0.63 | 0.87 | 0.93 | 0.81 | 22 | 0.16 | 1.00 | 1.00 | 1.00 | 22 | 0.22 | 0.87 | 0.96 | 0.84 |
| 3 | 0.74 | 0.83 | 0.90 | 0.74 | 23 | 0.16 | 1.00 | 1.00 | 1.00 | 13 | 0.32 | 0.80 | 0.93 | 0.74 |
| 13 | 0.74 | 0.80 | 0.80 | 0.64 | 24 | 0.16 | 1.00 | 1.00 | 1.00 | 20 | 0.32 | 0.80 | 0.93 | 0.74 |
| 9 | 0.84 | 0.70 | 0.80 | 0.56 | 26 | 0.16 | 1.00 | 1.00 | 1.00 | 2 | 0.48 | 0.60 | 0.77 | 0.46 |
| 20 | 0.84 | 0.70 | 0.80 | 0.56 | 30 | 0.16 | 1.00 | 1.00 | 1.00 | 5 | 0.48 | 0.60 | 0.77 | 0.46 |
| 26 | 0.84 | 0.70 | 0.67 | 0.47 | 6 | 0.30 | 0.67 | 0.97 | 0.65 | 11 | 0.48 | 0.60 | 0.77 | 0.46 |
| 11 | 0.90 | 0.60 | 0.67 | 0.40 | 9 | 0.30 | 0.67 | 0.97 | 0.65 | 21 | 0.48 | 0.60 | 0.77 | 0.46 |
| 21 | 0.90 | 0.60 | 0.67 | 0.40 | 15 | 0.46 | 0.63 | 0.94 | 0.59 | 25 | 0.48 | 0.60 | 0.77 | 0.46 |
| 23 | 0.90 | 0.60 | 0.67 | 0.40 | 29 | 0.54 | 0.60 | 0.91 | 0.55 | 28 | 0.48 | 0.60 | 0.77 | 0.46 |
| 18 | 0.94 | 0.57 | 0.63 | 0.36 | 2 | 0.70 | 0.47 | 0.75 | 0.35 | 8 | 0.52 | 0.57 | 0.75 | 0.43 |
| 1 | 1.00 | 0.00 | 0.00 | 0.00 | 4 | 0.70 | 0.47 | 0.75 | 0.35 | 6 | 0.58 | 0.50 | 0.69 | 0.34 |
| 2 | 1.00 | 0.00 | 0.00 | 0.00 | 8 | 0.70 | 0.47 | 0.75 | 0.35 | 29 | 0.58 | 0.50 | 0.69 | 0.34 |
| 5 | 1.00 | 0.00 | 0.00 | 0.00 | 20 | 0.70 | 0.47 | 0.75 | 0.35 | 15 | 0.74 | 0.43 | 0.65 | 0.28 |
| 6 | 1.00 | 0.00 | 0.00 | 0.00 | 5 | 0.84 | 0.17 | 0.31 | 0.05 | 4 | 0.84 | 0.40 | 0.60 | 0.24 |
| 7 | 1.00 | 0.00 | 0.00 | 0.00 | 7 | 0.84 | 0.17 | 0.31 | 0.05 | 1 | 0.90 | 0.20 | 0.32 | 0.06 |
| 10 | 1.00 | 0.00 | 0.00 | 0.00 | 11 | 0.84 | 0.17 | 0.31 | 0.05 | 10 | 0.90 | 0.20 | 0.32 | 0.06 |
| 12 | 1.00 | 0.00 | 0.00 | 0.00 | 14 | 0.84 | 0.17 | 0.31 | 0.05 | 12 | 0.90 | 0.20 | 0.32 | 0.06 |
| 14 | 1.00 | 0.00 | 0.00 | 0.00 | 18 | 0.84 | 0.17 | 0.31 | 0.05 | 19 | 0.90 | 0.20 | 0.32 | 0.06 |
| 16 | 1.00 | 0.00 | 0.00 | 0.00 | 21 | 0.84 | 0.17 | 0.31 | 0.05 | 26 | 0.90 | 0.20 | 0.32 | 0.06 |
| 17 | 1.00 | 0.00 | 0.00 | 0.00 | 25 | 0.84 | 0.17 | 0.31 | 0.05 | 27 | 0.90 | 0.20 | 0.32 | 0.06 |
| 19 | 1.00 | 0.00 | 0.00 | 0.00 | 27 | 0.84 | 0.17 | 0.31 | 0.05 | 7 | 1.00 | 0.00 | 0.00 | 0.00 |
| 22 | 1.00 | 0.00 | 0.00 | 0.00 | 28 | 0.84 | 0.17 | 0.31 | 0.05 | 14 | 1.00 | 0.00 | 0.00 | 0.00 |
| 25 | 1.00 | 0.00 | 0.00 | 0.00 | 1 | 1.00 | 0.00 | 0.00 | 0.00 | 16 | 1.00 | 0.00 | 0.00 | 0.00 |
| 27 | 1.00 | 0.00 | 0.00 | 0.00 | 13 | 1.00 | 0.00 | 0.00 | 0.00 | 17 | 1.00 | 0.00 | 0.00 | 0.00 |
| 28 | 1.00 | 0.00 | 0.00 | 0.00 | 16 | 1.00 | 0.00 | 0.00 | 0.00 | 23 | 1.00 | 0.00 | 0.00 | 0.00 |
| 30 | 1.00 | 0.00 | 0.00 | 0.00 | 17 | 1.00 | 0.00 | 0.00 | 0.00 | 30 | 1.00 | 0.00 | 0.00 | 0.00 |
| Sum | 25.62 |  |  | 0.3019 |  | 17.41 |  |  | 0.4439 |  | 19.05 |  |  | 0.3593 |

Remark: labels of Variables in table B1 defined as Equation (7)-(11).

TABLE B1: Continued

| **Code** | **S4** | **1-F5** | **1-L5** | **FSM5** | **Code** | **S5** | **1-F6** | **1-L6** | **FSM6** | **Code** | **S6** | **1-F7** | **1-L7** | **FSM7** |
| --- | --- | --- | --- | --- | --- | --- | --- | --- | --- | --- | --- | --- | --- | --- |
| 3 | 0.16 | 1.00 | 1.00 | 1.00 | 3 | 0.10 | 1.00 | 1.00 | 1.00 | 3 | 0.16 | 1.00 | 1.00 | 1.00 |
| 19 | 0.29 | 0.90 | 0.95 | 0.86 | 9 | 0.10 | 1.00 | 1.00 | 1.00 | 22 | 0.36 | 0.97 | 0.98 | 0.95 |
| 24 | 0.29 | 0.90 | 0.95 | 0.86 | 12 | 0.10 | 1.00 | 1.00 | 1.00 | 6 | 0.43 | 0.93 | 0.96 | 0.90 |
| 25 | 0.29 | 0.90 | 0.95 | 0.86 | 15 | 0.10 | 1.00 | 1.00 | 1.00 | 2 | 0.52 | 0.60 | 0.73 | 0.44 |
| 15 | 0.43 | 0.83 | 0.91 | 0.75 | 23 | 0.10 | 1.00 | 1.00 | 1.00 | 5 | 0.52 | 0.60 | 0.73 | 0.44 |
| 18 | 0.43 | 0.83 | 0.91 | 0.75 | 25 | 0.10 | 1.00 | 1.00 | 1.00 | 7 | 0.52 | 0.60 | 0.73 | 0.44 |
| 6 | 0.44 | 0.76 | 0.86 | 0.66 | 21 | 0.26 | 0.83 | 0.98 | 0.82 | 9 | 0.52 | 0.60 | 0.73 | 0.44 |
| 17 | 0.44 | 0.76 | 0.86 | 0.66 | 14 | 0.38 | 0.73 | 0.92 | 0.67 | 11 | 0.52 | 0.60 | 0.73 | 0.44 |
| 5 | 0.56 | 0.60 | 0.71 | 0.43 | 24 | 0.38 | 0.73 | 0.92 | 0.67 | 14 | 0.52 | 0.60 | 0.73 | 0.44 |
| 11 | 0.56 | 0.60 | 0.71 | 0.43 | 30 | 0.38 | 0.73 | 0.92 | 0.67 | 19 | 0.52 | 0.60 | 0.73 | 0.44 |
| 26 | 0.56 | 0.60 | 0.71 | 0.43 | 2 | 0.44 | 0.70 | 0.89 | 0.62 | 20 | 0.52 | 0.60 | 0.73 | 0.44 |
| 28 | 0.56 | 0.60 | 0.71 | 0.43 | 6 | 0.46 | 0.67 | 0.86 | 0.58 | 25 | 0.52 | 0.60 | 0.73 | 0.44 |
| 29 | 0.56 | 0.60 | 0.71 | 0.43 | 1 | 0.54 | 0.63 | 0.83 | 0.52 | 28 | 0.52 | 0.60 | 0.73 | 0.44 |
| 1 | 0.57 | 0.47 | 0.60 | 0.28 | 20 | 0.56 | 0.60 | 0.80 | 0.48 | 8 | 0.73 | 0.53 | 0.66 | 0.35 |
| 2 | 0.57 | 0.47 | 0.60 | 0.28 | 18 | 0.60 | 0.47 | 0.69 | 0.32 | 29 | 0.73 | 0.53 | 0.66 | 0.35 |
| 10 | 0.57 | 0.47 | 0.60 | 0.28 | 19 | 0.60 | 0.47 | 0.69 | 0.32 | 12 | 0.84 | 0.37 | 0.47 | 0.17 |
| 30 | 0.57 | 0.47 | 0.60 | 0.28 | 26 | 0.60 | 0.47 | 0.69 | 0.32 | 13 | 0.84 | 0.37 | 0.47 | 0.17 |
| 9 | 0.60 | 0.40 | 0.53 | 0.21 | 11 | 0.62 | 0.40 | 0.62 | 0.25 | 15 | 0.84 | 0.37 | 0.47 | 0.17 |
| 22 | 0.60 | 0.40 | 0.53 | 0.21 | 28 | 0.62 | 0.40 | 0.62 | 0.25 | 18 | 0.84 | 0.37 | 0.47 | 0.17 |
| 12 | 0.71 | 0.37 | 0.49 | 0.18 | 8 | 0.67 | 0.37 | 0.58 | 0.21 | 24 | 0.84 | 0.37 | 0.47 | 0.17 |
| 14 | 0.72 | 0.33 | 0.46 | 0.15 | 29 | 0.72 | 0.33 | 0.54 | 0.18 | 1 | 1.00 | 0.00 | 0.00 | 0.00 |
| 13 | 0.84 | 0.30 | 0.41 | 0.12 | 22 | 0.74 | 0.30 | 0.49 | 0.15 | 4 | 1.00 | 0.00 | 0.00 | 0.00 |
| 4 | 0.88 | 0.20 | 0.27 | 0.05 | 5 | 0.78 | 0.27 | 0.45 | 0.12 | 10 | 1.00 | 0.00 | 0.00 | 0.00 |
| 8 | 0.88 | 0.20 | 0.27 | 0.05 | 4 | 0.94 | 0.20 | 0.33 | 0.07 | 16 | 1.00 | 0.00 | 0.00 | 0.00 |
| 20 | 0.88 | 0.20 | 0.27 | 0.05 | 7 | 0.94 | 0.20 | 0.33 | 0.07 | 17 | 1.00 | 0.00 | 0.00 | 0.00 |
| 7 | 1.00 | 0.00 | 0.00 | 0.00 | 10 | 1.00 | 0.00 | 0.00 | 0.00 | 21 | 1.00 | 0.00 | 0.00 | 0.00 |
| 16 | 1.00 | 0.00 | 0.00 | 0.00 | 13 | 1.00 | 0.00 | 0.00 | 0.00 | 23 | 1.00 | 0.00 | 0.00 | 0.00 |
| 21 | 1.00 | 0.00 | 0.00 | 0.00 | 16 | 1.00 | 0.00 | 0.00 | 0.00 | 26 | 1.00 | 0.00 | 0.00 | 0.00 |
| 23 | 1.00 | 0.00 | 0.00 | 0.00 | 17 | 1.00 | 0.00 | 0.00 | 0.00 | 27 | 1.00 | 0.00 | 0.00 | 0.00 |
| 27 | 1.00 | 0.00 | 0.00 | 0.00 | 27 | 1.00 | 0.00 | 0.00 | 0.00 | 30 | 1.00 | 0.00 | 0.00 | 0.00 |
| Sum | 18.92 |  |  | 0.3569 |  | 16.85 |  |  | 0.4430 |  | 21.79 |  |  | 0.2924 |

Remark: labels of Variables in table B1 defined as Equation (7)-(11).
